# Supplementary material for: Bayesian localization of CNV candidates in WGS data within minutes
Source: PubMed Central journal article supplement (PMC6757390; doi:10.1186/s13015-019-0154-7), 2019-09-23
Supplement: 13015_2019_154_MOESM1_ESM.pdf [file 13015_2019_154_MOESM1_ESM.pdf]

**Table S1. Significantly enriched GO categories.**

The results for each enriched GO category are listed in this table. For each GO category, the first row lists its sub-root (biological process, molecular function, or cellular component), category name, and corresponding GO ID. The second row lists number of reference genes in the category (C), number of genes in the gene set and also in the category (O), expected number in the category (E), Ratio of enrichment (R), p value from hypergeometric test (rawP), and p value adjusted by the multiple test adjustment (adjP). Finally, genes in the category are listed. For each gene, the table lists the user uploaded ID and value (optional), Entrez ID, Ensembl Gene Stable ID, Gene symbol, and description.

|                                                   |                                  |            |                                                                |                           |
|---------------------------------------------------|----------------------------------|------------|----------------------------------------------------------------|---------------------------|
| biological process                                | synapse assembly                 | GO:0007416 |                                                                |                           |
| C=65;O=5;E=0.24;R=20.88;rawP=3.88e-06;adjP=0.0028 |                                  |            |                                                                |                           |
| Cacna1a                                           | NA                               | Cacna1a    | calcium channel, voltage-dependent, P/Q type, alpha 1A subunit | 25398 ENSRNOG00000002559  |
| Cdh2                                              | NA                               | Cdh2       | cadherin 2                                                     | 83501 ENSRNOG00000015602  |
| Ephb1                                             | NA                               | Ephb1      | Eph receptor B1                                                | 24338 ENSRNOG00000007865  |
| Nrg1                                              | NA                               | Nrg1       | neuregulin 1                                                   | 112400 ENSRNOG00000010392 |
| Ptk2                                              | NA                               | Ptk2       | PTK2 protein tyrosine kinase 2                                 | 25614 ENSRNOG00000007916  |
| biological process                                | regulation of cell communication | GO:0010646 |                                                                |                           |
| C=1792;O=17;E=6.60;R=2.57;rawP=0.0001;adjP=0.0064 |                                  |            |                                                                |                           |
| Cacna1a                                           | NA                               | Cacna1a    | calcium channel, voltage-dependent, P/Q type, alpha 1A subunit | 25398 ENSRNOG00000002559  |
| Cdh2                                              | NA                               | Cdh2       | cadherin 2                                                     | 83501 ENSRNOG00000015602  |
| Ephb1                                             | NA                               | Ephb1      | Eph receptor B1                                                | 24338 ENSRNOG00000007865  |
| Myo9b                                             | NA                               | Myo9b      | myosin IXb                                                     | 25486 ENSRNOG00000016256  |
| Gria4                                             | NA                               | Gria4      | glutamate receptor, ionotropic, AMPA 4                         | 29629 ENSRNOG00000006957  |
| Camk2g                                            | NA                               | Camk2g     | calcium/calmodulin-dependent protein kinase II gamma           | 171140 ENSRNOG00000009783 |
| Plau                                              | NA                               | Plau       | plasminogen activator, urokinase                               | 25619 ENSRNOG00000010516  |
| Sall1                                             | NA                               | Sall1      | sal-like 1 (Drosophila)                                        | 307740 NULL               |
| Cyth1                                             | NA                               | Cyth1      | cytohesin 1                                                    | 116691 ENSRNOG00000043381 |
| Epha4                                             | NA                               | Epha4      | Eph receptor A4                                                | 316539 ENSRNOG00000013213 |
| Ppp3cb                                            | NA                               | Ppp3cb     | protein phosphatase 3, catalytic subunit, beta isozyme         | 24675 ENSRNOG00000007757  |
| Scoc                                              | NA                               | Scoc       | short coiled-coil protein                                      | 364981 ENSRNOG00000003853 |
| Egfr                                              | NA                               | Egfr       | epidermal growth factor receptor                               | 24329 ENSRNOG00000004332  |
| Nrg1                                              | NA                               | Nrg1       | neuregulin 1                                                   | 112400 ENSRNOG00000010392 |
| Ptk2                                              | NA                               | Ptk2       | PTK2 protein tyrosine kinase 2                                 | 25614 ENSRNOG00000007916  |
| Rheb                                              | NA                               | Rheb       | Ras homolog enriched in brain                                  | 26954 NULL                |
| Uaca                                              | NA                               | Uaca       | uveal autoantigen with coiled-coil domains and ankyrin repeats | 315732 NULL               |

biological process localization of cell  
C=807;O=11;E=2.97;R=3.70;rawP=0.0001;adjP=0.0064

Cdh2 NA  
Ddr2 NA  
Ephb1 NA  
Epha4 NA  
Myo9b NA  
Egfr NA  
Ptk2 NA  
Nrg1 NA  
Plau NA  
Dcdc2 NA  
Vcl NA

GO:0051674

Cdh2 cadherin 2  
Ddr2 discoidin domain receptor tyrosine kinase 2  
Ephb1 Eph receptor B1  
Epha4 Eph receptor A4  
Myo9b myosin IXb  
Egfr epidermal growth factor receptor  
Ptk2 PTK2 protein tyrosine kinase 2  
Nrg1 neuregulin 1  
Plau plasminogen activator, urokinase  
Dcdc2 doublecortin domain containing 2  
Vcl vinculin

83501 ENSRNOG00000015602  
685781 ENSRNOG00000002881  
24338 ENSRNOG00000007865  
316539 ENSRNOG00000013213  
25486 ENSRNOG00000016256  
24329 ENSRNOG00000004332  
25614 ENSRNOG00000007916  
112400 ENSRNOG00000010392  
25619 ENSRNOG00000010516  
291130 ENSRNOG00000017511  
305679 ENSRNOG00000010765

biological process establishment of cell polarity  
C=65;O=4;E=0.24;R=16.70;rawP=9.37e-05;adjP=0.0064

Sdccag8 NA  
Ephb1 NA  
Cyth1 NA  
Myo9b NA

GO:0030010

Sdccag8 serologically defined colon cancer antigen 8  
Ephb1 Eph receptor B1  
Cyth1 cytohesin 1  
Myo9b myosin IXb

305002 ENSRNOG00000004181  
24338 ENSRNOG00000007865  
116691 ENSRNOG00000043381  
25486 ENSRNOG00000016256

biological process synapse organization  
C=128;O=5;E=0.47;R=10.60;rawP=0.0001;adjP=0.0064

Cacna1a NA  
Cdh2 NA  
Ephb1 NA  
Nrg1 NA  
Ptk2 NA

GO:0050808

Cacna1a calcium channel, voltage-dependent, P/Q type, alpha 1A subunit  
Cdh2 cadherin 2  
Ephb1 Eph receptor B1  
Nrg1 neuregulin 1  
Ptk2 PTK2 protein tyrosine kinase 2

25398 ENSRNOG00000002559  
83501 ENSRNOG00000015602  
24338 ENSRNOG00000007865  
112400 ENSRNOG00000010392  
25614 ENSRNOG00000007916

biological process regulation of transmission of nerve impulse  
C=259;O=7;E=0.95;R=7.34;rawP=4.24e-05;adjP=0.0064

Cacna1a NA  
Egfr NA  
Cdh2 NA  
Gria4 NA

GO:0051969

Cacna1a calcium channel, voltage-dependent, P/Q type, alpha 1A subunit  
Egfr epidermal growth factor receptor  
Cdh2 cadherin 2  
Gria4 glutamate receptor, ionotropic, AMPA 4

25398 ENSRNOG00000002559  
24329 ENSRNOG00000004332  
83501 ENSRNOG00000015602  
29629 ENSRNOG00000006957

|        |    |        |                                                      |        |                    |
|--------|----|--------|------------------------------------------------------|--------|--------------------|
| Camk2g | NA | Camk2g | calcium/calmodulin-dependent protein kinase II gamma | 171140 | ENSRNOG00000009783 |
| Ptk2   | NA | Ptk2   | PTK2 protein tyrosine kinase 2                       | 25614  | ENSRNOG00000007916 |
| Rheb   | NA | Rheb   | Ras homolog enriched in brain                        | 26954  | NULL               |

biological process cell migration  
C=750;O=11;E=2.76;R=3.98;rawP=7.13e-05;adjP=0.0064

GO:0016477

|       |    |       |                                             |        |                    |
|-------|----|-------|---------------------------------------------|--------|--------------------|
| Cdh2  | NA | Cdh2  | cadherin 2                                  | 83501  | ENSRNOG00000015602 |
| Ddr2  | NA | Ddr2  | discoidin domain receptor tyrosine kinase 2 | 685781 | ENSRNOG00000002881 |
| Ephb1 | NA | Ephb1 | Eph receptor B1                             | 24338  | ENSRNOG00000007865 |
| Epha4 | NA | Epha4 | Eph receptor A4                             | 316539 | ENSRNOG00000013213 |
| Myo9b | NA | Myo9b | myosin IXb                                  | 25486  | ENSRNOG00000016256 |
| Egfr  | NA | Egfr  | epidermal growth factor receptor            | 24329  | ENSRNOG00000004332 |
| Ptk2  | NA | Ptk2  | PTK2 protein tyrosine kinase 2              | 25614  | ENSRNOG00000007916 |
| Nrg1  | NA | Nrg1  | neuregulin 1                                | 112400 | ENSRNOG00000010392 |
| Plau  | NA | Plau  | plasminogen activator, urokinase            | 25619  | ENSRNOG00000010516 |
| Dcdc2 | NA | Dcdc2 | doublecortin domain containing 2            | 291130 | ENSRNOG00000017511 |
| Vcl   | NA | Vcl   | vinculin                                    | 305679 | ENSRNOG00000010765 |

biological process regulation of neurological system process  
C=283;O=7;E=1.04;R=6.71;rawP=7.43e-05;adjP=0.0064

GO:0031644

|         |    |         |                                                                |        |                    |
|---------|----|---------|----------------------------------------------------------------|--------|--------------------|
| Cacna1a | NA | Cacna1a | calcium channel, voltage-dependent, P/Q type, alpha 1A subunit | 25398  | ENSRNOG00000002559 |
| Egfr    | NA | Egfr    | epidermal growth factor receptor                               | 24329  | ENSRNOG00000004332 |
| Cdh2    | NA | Cdh2    | cadherin 2                                                     | 83501  | ENSRNOG00000015602 |
| Gria4   | NA | Gria4   | glutamate receptor, ionotropic, AMPA 4                         | 29629  | ENSRNOG00000006957 |
| Camk2g  | NA | Camk2g  | calcium/calmodulin-dependent protein kinase II gamma           | 171140 | ENSRNOG00000009783 |
| Ptk2    | NA | Ptk2    | PTK2 protein tyrosine kinase 2                                 | 25614  | ENSRNOG00000007916 |
| Rheb    | NA | Rheb    | Ras homolog enriched in brain                                  | 26954  | NULL               |

biological process protein autophosphorylation  
C=182;O=6;E=0.67;R=8.95;rawP=5.24e-05;adjP=0.0064

GO:0046777

|        |    |        |                                                      |        |                    |
|--------|----|--------|------------------------------------------------------|--------|--------------------|
| Egfr   | NA | Egfr   | epidermal growth factor receptor                     | 24329  | ENSRNOG00000004332 |
| Ddr2   | NA | Ddr2   | discoidin domain receptor tyrosine kinase 2          | 685781 | ENSRNOG00000002881 |
| Ephb1  | NA | Ephb1  | Eph receptor B1                                      | 24338  | ENSRNOG00000007865 |
| Epha4  | NA | Epha4  | Eph receptor A4                                      | 316539 | ENSRNOG00000013213 |
| Camk2g | NA | Camk2g | calcium/calmodulin-dependent protein kinase II gamma | 171140 | ENSRNOG00000009783 |
| Ptk2   | NA | Ptk2   | PTK2 protein tyrosine kinase 2                       | 25614  | ENSRNOG00000007916 |

biological process cell motility

C=807;O=11;E=2.97;R=3.70;rawP=0.0001;adjP=0.0064

Cdh2 NA  
Ddr2 NA  
Ephb1 NA  
Epha4 NA  
Myo9b NA  
Egfr NA  
Ptk2 NA  
Nrg1 NA  
Plau NA  
Dcdc2 NA  
Vcl NA

GO:0048870

Cdh2 cadherin 2 83501 ENSRNOG00000015602  
Ddr2 discoidin domain receptor tyrosine kinase 2 685781 ENSRNOG00000002881  
Ephb1 Eph receptor B1 24338 ENSRNOG00000007865  
Epha4 Eph receptor A4 316539 ENSRNOG00000013213  
Myo9b myosin IXb 25486 ENSRNOG00000016256  
Egfr epidermal growth factor receptor 24329 ENSRNOG00000004332  
Ptk2 PTK2 protein tyrosine kinase 2 25614 ENSRNOG00000007916  
Nrg1 neuregulin 1 112400 ENSRNOG00000010392  
Plau plasminogen activator, urokinase 25619 ENSRNOG00000010516  
Dcdc2 doublecortin domain containing 2 291130 ENSRNOG00000017511  
Vcl vinculin 305679 ENSRNOG00000010765

biological process central nervous system neuron axonogenesis

C=28;O=3;E=0.10;R=29.08;rawP=0.0001;adjP=0.0064

Ephb1 NA  
Epha4 NA  
Ptk2 NA

GO:0021955

Ephb1 Eph receptor B1 24338 ENSRNOG00000007865  
Epha4 Eph receptor A4 316539 ENSRNOG00000013213  
Ptk2 PTK2 protein tyrosine kinase 2 25614 ENSRNOG00000007916

biological process regulation of synaptic transmission

C=233;O=6;E=0.86;R=6.99;rawP=0.0002;adjP=0.0068

Cacna1a NA  
Egfr NA  
Gria4 NA  
Camk2g NA  
Ptk2 NA  
Rheb NA

GO:0050804

Cacna1a calcium channel, voltage-dependent, P/Q type, alpha 1A subunit 25398 ENSRNOG00000002559  
Egfr epidermal growth factor receptor 24329 ENSRNOG00000004332  
Gria4 glutamate receptor, ionotropic, AMPA 4 29629 ENSRNOG00000006957  
Camk2g calcium/calmodulin-dependent protein kinase II gamma 171140 ENSRNOG00000009783  
Ptk2 PTK2 protein tyrosine kinase 2 25614 ENSRNOG00000007916  
Rheb Ras homolog enriched in brain 26954 NULL

biological process dendrite morphogenesis

C=76;O=4;E=0.28;R=14.29;rawP=0.0002;adjP=0.0068

Cacna1a NA  
Ephb1 NA  
Epha4 NA

GO:0048813

Cacna1a calcium channel, voltage-dependent, P/Q type, alpha 1A subunit 25398 ENSRNOG00000002559  
Ephb1 Eph receptor B1 24338 ENSRNOG00000007865  
Epha4 Eph receptor A4 316539 ENSRNOG00000013213

|                                                           |    |            |                                                                |        |                    |
|-----------------------------------------------------------|----|------------|----------------------------------------------------------------|--------|--------------------|
| Dcdc2                                                     | NA | Dcdc2      | doublecortin domain containing 2                               | 291130 | ENSRNOG00000017511 |
| biological process transmission of nerve impulse          |    | GO:0019226 |                                                                |        |                    |
| C=575;O=9;E=2.12;R=4.25;rawP=0.0002;adjP=0.0068           |    |            |                                                                |        |                    |
| Cacna1a                                                   | NA | Cacna1a    | calcium channel, voltage-dependent, P/Q type, alpha 1A subunit | 25398  | ENSRNOG00000002559 |
| Cdh2                                                      | NA | Cdh2       | cadherin 2                                                     | 83501  | ENSRNOG00000015602 |
| Ephb1                                                     | NA | Ephb1      | Eph receptor B1                                                | 24338  | ENSRNOG00000007865 |
| Egfr                                                      | NA | Egfr       | epidermal growth factor receptor                               | 24329  | ENSRNOG00000004332 |
| Gria4                                                     | NA | Gria4      | glutamate receptor, ionotropic, AMPA 4                         | 29629  | ENSRNOG00000006957 |
| Ptk2                                                      | NA | Ptk2       | PTK2 protein tyrosine kinase 2                                 | 25614  | ENSRNOG00000007916 |
| Nrg1                                                      | NA | Nrg1       | neuregulin 1                                                   | 112400 | ENSRNOG00000010392 |
| Camk2g                                                    | NA | Camk2g     | calcium/calmodulin-dependent protein kinase II gamma           | 171140 | ENSRNOG00000009783 |
| Rheb                                                      | NA | Rheb       | Ras homolog enriched in brain                                  | 26954  | NULL               |
| biological process monovalent inorganic anion homeostasis |    | GO:0055083 |                                                                |        |                    |
| C=6;O=2;E=0.02;R=90.48;rawP=0.0002;adjP=0.0068            |    |            |                                                                |        |                    |
| Cacna1a                                                   | NA | Cacna1a    | calcium channel, voltage-dependent, P/Q type, alpha 1A subunit | 25398  | ENSRNOG00000002559 |
| Ptk2                                                      | NA | Ptk2       | PTK2 protein tyrosine kinase 2                                 | 25614  | ENSRNOG00000007916 |
| biological process chloride ion homeostasis               |    | GO:0055064 |                                                                |        |                    |
| C=6;O=2;E=0.02;R=90.48;rawP=0.0002;adjP=0.0068            |    |            |                                                                |        |                    |
| Cacna1a                                                   | NA | Cacna1a    | calcium channel, voltage-dependent, P/Q type, alpha 1A subunit | 25398  | ENSRNOG00000002559 |
| Ptk2                                                      | NA | Ptk2       | PTK2 protein tyrosine kinase 2                                 | 25614  | ENSRNOG00000007916 |
| biological process cellular chloride ion homeostasis      |    | GO:0030644 |                                                                |        |                    |
| C=6;O=2;E=0.02;R=90.48;rawP=0.0002;adjP=0.0068            |    |            |                                                                |        |                    |
| Cacna1a                                                   | NA | Cacna1a    | calcium channel, voltage-dependent, P/Q type, alpha 1A subunit | 25398  | ENSRNOG00000002559 |
| Ptk2                                                      | NA | Ptk2       | PTK2 protein tyrosine kinase 2                                 | 25614  | ENSRNOG00000007916 |
| biological process biological adhesion                    |    | GO:0022610 |                                                                |        |                    |
| C=695;O=10;E=2.56;R=3.91;rawP=0.0002;adjP=0.0068          |    |            |                                                                |        |                    |
| Stab2                                                     | NA | Stab2      | stabilin 2                                                     | 282580 | NULL               |
| Cdh2                                                      | NA | Cdh2       | cadherin 2                                                     | 83501  | ENSRNOG00000015602 |

|       |    |       |                                  |        |                    |
|-------|----|-------|----------------------------------|--------|--------------------|
| Ephb1 | NA | Ephb1 | Eph receptor B1                  | 24338  | ENSRNOG00000007865 |
| Cyth1 | NA | Cyth1 | cytohesin 1                      | 116691 | ENSRNOG00000043381 |
| Egfr  | NA | Egfr  | epidermal growth factor receptor | 24329  | ENSRNOG00000004332 |
| Ptk2  | NA | Ptk2  | PTK2 protein tyrosine kinase 2   | 25614  | ENSRNOG00000007916 |
| Nrg1  | NA | Nrg1  | neuregulin 1                     | 112400 | ENSRNOG00000010392 |
| Plau  | NA | Plau  | plasminogen activator, urokinase | 25619  | ENSRNOG00000010516 |
| Vcl   | NA | Vcl   | vinculin                         | 305679 | ENSRNOG00000010765 |
| Cdh19 | NA | Cdh19 | cadherin 19, type 2              | 360835 | ENSRNOG00000029841 |

biological process cellular monovalent inorganic anion homeostasis

C=6;O=2;E=0.02;R=90.48;rawP=0.0002;adjP=0.0068

|         |    |         |                                                                |       |                    |
|---------|----|---------|----------------------------------------------------------------|-------|--------------------|
| Cacna1a | NA | Cacna1a | calcium channel, voltage-dependent, P/Q type, alpha 1A subunit | 25398 | ENSRNOG00000002559 |
| Ptk2    | NA | Ptk2    | PTK2 protein tyrosine kinase 2                                 | 25614 | ENSRNOG00000007916 |

biological process cell adhesion

C=692;O=10;E=2.55;R=3.92;rawP=0.0002;adjP=0.0068

|       |    |       |                                  |        |                    |
|-------|----|-------|----------------------------------|--------|--------------------|
| Stab2 | NA | Stab2 | stabilin 2                       | 282580 | NULL               |
| Cdh2  | NA | Cdh2  | cadherin 2                       | 83501  | ENSRNOG00000015602 |
| Ephb1 | NA | Ephb1 | Eph receptor B1                  | 24338  | ENSRNOG00000007865 |
| Cyth1 | NA | Cyth1 | cytohesin 1                      | 116691 | ENSRNOG00000043381 |
| Egfr  | NA | Egfr  | epidermal growth factor receptor | 24329  | ENSRNOG00000004332 |
| Ptk2  | NA | Ptk2  | PTK2 protein tyrosine kinase 2   | 25614  | ENSRNOG00000007916 |
| Nrg1  | NA | Nrg1  | neuregulin 1                     | 112400 | ENSRNOG00000010392 |
| Plau  | NA | Plau  | plasminogen activator, urokinase | 25619  | ENSRNOG00000010516 |
| Vcl   | NA | Vcl   | vinculin                         | 305679 | ENSRNOG00000010765 |
| Cdh19 | NA | Cdh19 | cadherin 19, type 2              | 360835 | ENSRNOG00000029841 |

biological process cellular component movement

C=990;O=12;E=3.65;R=3.29;rawP=0.0002;adjP=0.0068

|       |    |       |                                             |        |                    |
|-------|----|-------|---------------------------------------------|--------|--------------------|
| Cdh2  | NA | Cdh2  | cadherin 2                                  | 83501  | ENSRNOG00000015602 |
| Ddr2  | NA | Ddr2  | discoidin domain receptor tyrosine kinase 2 | 685781 | ENSRNOG00000002881 |
| Ephb1 | NA | Ephb1 | Eph receptor B1                             | 24338  | ENSRNOG00000007865 |
| Epha4 | NA | Epha4 | Eph receptor A4                             | 316539 | ENSRNOG00000013213 |
| Myo9b | NA | Myo9b | myosin IXb                                  | 25486  | ENSRNOG00000016256 |
| Elmo1 | NA | Elmo1 | engulfment and cell motility 1              | 361251 | ENSRNOG00000018726 |
| Egfr  | NA | Egfr  | epidermal growth factor receptor            | 24329  | ENSRNOG00000004332 |

|       |    |       |                                  |        |                    |
|-------|----|-------|----------------------------------|--------|--------------------|
| Plau  | NA | Plau  | plasminogen activator, urokinase | 25619  | ENSRNOG00000010516 |
| Ptk2  | NA | Ptk2  | PTK2 protein tyrosine kinase 2   | 25614  | ENSRNOG00000007916 |
| Nrg1  | NA | Nrg1  | neuregulin 1                     | 112400 | ENSRNOG00000010392 |
| Dcdc2 | NA | Dcdc2 | doublecortin domain containing 2 | 291130 | ENSRNOG00000017511 |
| Vcl   | NA | Vcl   | vinculin                         | 305679 | ENSRNOG00000010765 |

biological process multicellular organismal signaling  
C=596;O=9;E=2.20;R=4.10;rawP=0.0003;adjP=0.0089

GO:0035637

|         |    |         |                                                                |        |                    |
|---------|----|---------|----------------------------------------------------------------|--------|--------------------|
| Cacna1a | NA | Cacna1a | calcium channel, voltage-dependent, P/Q type, alpha 1A subunit | 25398  | ENSRNOG00000002559 |
| Cdh2    | NA | Cdh2    | cadherin 2                                                     | 83501  | ENSRNOG00000015602 |
| Ephb1   | NA | Ephb1   | Eph receptor B1                                                | 24338  | ENSRNOG00000007865 |
| Egfr    | NA | Egfr    | epidermal growth factor receptor                               | 24329  | ENSRNOG00000004332 |
| Gria4   | NA | Gria4   | glutamate receptor, ionotropic, AMPA 4                         | 29629  | ENSRNOG00000006957 |
| Ptk2    | NA | Ptk2    | PTK2 protein tyrosine kinase 2                                 | 25614  | ENSRNOG00000007916 |
| Nrg1    | NA | Nrg1    | neuregulin 1                                                   | 112400 | ENSRNOG00000010392 |
| Camk2g  | NA | Camk2g  | calcium/calmodulin-dependent protein kinase II gamma           | 171140 | ENSRNOG00000009783 |
| Rheb    | NA | Rheb    | Ras homolog enriched in brain                                  | 26954  | NULL               |

biological process synaptic transmission  
C=470;O=8;E=1.73;R=4.62;rawP=0.0003;adjP=0.0089

GO:0007268

|         |    |         |                                                                |        |                    |
|---------|----|---------|----------------------------------------------------------------|--------|--------------------|
| Cacna1a | NA | Cacna1a | calcium channel, voltage-dependent, P/Q type, alpha 1A subunit | 25398  | ENSRNOG00000002559 |
| Ephb1   | NA | Ephb1   | Eph receptor B1                                                | 24338  | ENSRNOG00000007865 |
| Egfr    | NA | Egfr    | epidermal growth factor receptor                               | 24329  | ENSRNOG00000004332 |
| Gria4   | NA | Gria4   | glutamate receptor, ionotropic, AMPA 4                         | 29629  | ENSRNOG00000006957 |
| Ptk2    | NA | Ptk2    | PTK2 protein tyrosine kinase 2                                 | 25614  | ENSRNOG00000007916 |
| Nrg1    | NA | Nrg1    | neuregulin 1                                                   | 112400 | ENSRNOG00000010392 |
| Camk2g  | NA | Camk2g  | calcium/calmodulin-dependent protein kinase II gamma           | 171140 | ENSRNOG00000009783 |
| Rheb    | NA | Rheb    | Ras homolog enriched in brain                                  | 26954  | NULL               |

biological process cell-cell signaling  
C=746;O=10;E=2.75;R=3.64;rawP=0.0003;adjP=0.0089

GO:0007267

|         |    |         |                                                                |       |                    |
|---------|----|---------|----------------------------------------------------------------|-------|--------------------|
| Cacna1a | NA | Cacna1a | calcium channel, voltage-dependent, P/Q type, alpha 1A subunit | 25398 | ENSRNOG00000002559 |
| Ephb1   | NA | Ephb1   | Eph receptor B1                                                | 24338 | ENSRNOG00000007865 |
| Ppp3cb  | NA | Ppp3cb  | protein phosphatase 3, catalytic subunit, beta isozyme         | 24675 | ENSRNOG00000007757 |
| Egfr    | NA | Egfr    | epidermal growth factor receptor                               | 24329 | ENSRNOG00000004332 |
| Gria4   | NA | Gria4   | glutamate receptor, ionotropic, AMPA 4                         | 29629 | ENSRNOG00000006957 |

|        |    |        |                                                      |        |                    |
|--------|----|--------|------------------------------------------------------|--------|--------------------|
| Ptk2   | NA | Ptk2   | PTK2 protein tyrosine kinase 2                       | 25614  | ENSRNOG00000007916 |
| Nrg1   | NA | Nrg1   | neuregulin 1                                         | 112400 | ENSRNOG00000010392 |
| Camk2g | NA | Camk2g | calcium/calmodulin-dependent protein kinase II gamma | 171140 | ENSRNOG00000009783 |
| Rheb   | NA | Rheb   | Ras homolog enriched in brain                        | 26954  | NULL               |
| Sall1  | NA | Sall1  | sal-like 1 (Drosophila)                              | 307740 | NULL               |

biological process cell projection morphogenesis  
C=496;O=8;E=1.83;R=4.38;rawP=0.0004;adjP=0.0105

GO:0048858

|         |    |         |                                                                |        |                    |
|---------|----|---------|----------------------------------------------------------------|--------|--------------------|
| Cacna1a | NA | Cacna1a | calcium channel, voltage-dependent, P/Q type, alpha 1A subunit | 25398  | ENSRNOG00000002559 |
| Cdh2    | NA | Cdh2    | cadherin 2                                                     | 83501  | ENSRNOG00000015602 |
| Ephb1   | NA | Ephb1   | Eph receptor B1                                                | 24338  | ENSRNOG00000007865 |
| Epha4   | NA | Epha4   | Eph receptor A4                                                | 316539 | ENSRNOG00000013213 |
| Myo9b   | NA | Myo9b   | myosin IXb                                                     | 25486  | ENSRNOG00000016256 |
| Egfr    | NA | Egfr    | epidermal growth factor receptor                               | 24329  | ENSRNOG00000004332 |
| Ptk2    | NA | Ptk2    | PTK2 protein tyrosine kinase 2                                 | 25614  | ENSRNOG00000007916 |
| Dcdc2   | NA | Dcdc2   | doublecortin domain containing 2                               | 291130 | ENSRNOG00000017511 |

biological process cell morphogenesis  
C=756;O=10;E=2.79;R=3.59;rawP=0.0004;adjP=0.0105

GO:0000902

|         |    |         |                                                                |        |                    |
|---------|----|---------|----------------------------------------------------------------|--------|--------------------|
| Cacna1a | NA | Cacna1a | calcium channel, voltage-dependent, P/Q type, alpha 1A subunit | 25398  | ENSRNOG00000002559 |
| Cdh2    | NA | Cdh2    | cadherin 2                                                     | 83501  | ENSRNOG00000015602 |
| Ephb1   | NA | Ephb1   | Eph receptor B1                                                | 24338  | ENSRNOG00000007865 |
| Epha4   | NA | Epha4   | Eph receptor A4                                                | 316539 | ENSRNOG00000013213 |
| Myo9b   | NA | Myo9b   | myosin IXb                                                     | 25486  | ENSRNOG00000016256 |
| Egfr    | NA | Egfr    | epidermal growth factor receptor                               | 24329  | ENSRNOG00000004332 |
| Ptk2    | NA | Ptk2    | PTK2 protein tyrosine kinase 2                                 | 25614  | ENSRNOG00000007916 |
| Nrg1    | NA | Nrg1    | neuregulin 1                                                   | 112400 | ENSRNOG00000010392 |
| Dcdc2   | NA | Dcdc2   | doublecortin domain containing 2                               | 291130 | ENSRNOG00000017511 |
| Sall1   | NA | Sall1   | sal-like 1 (Drosophila)                                        | 307740 | NULL               |

biological process establishment or maintenance of cell polarity  
C=97;O=4;E=0.36;R=11.19;rawP=0.0004;adjP=0.0105

GO:0007163

|         |    |         |                                              |        |                    |
|---------|----|---------|----------------------------------------------|--------|--------------------|
| Sdccag8 | NA | Sdccag8 | serologically defined colon cancer antigen 8 | 305002 | ENSRNOG00000004181 |
| Ephb1   | NA | Ephb1   | Eph receptor B1                              | 24338  | ENSRNOG00000007865 |
| Cyth1   | NA | Cyth1   | cytohesin 1                                  | 116691 | ENSRNOG00000043381 |
| Myo9b   | NA | Myo9b   | myosin IXb                                   | 25486  | ENSRNOG00000016256 |



biological process cell part morphogenesis

C=509;O=8;E=1.88;R=4.27;rawP=0.0005;adjP=0.0114

Cacna1a NA  
Cdh2 NA  
Ephb1 NA  
Epha4 NA  
Myo9b NA  
Egfr NA  
Ptk2 NA  
Dcdc2 NA

GO:0032990

Cacna1a calcium channel, voltage-dependent, P/Q type, alpha 1A subunit 25398 ENSRNOG00000002559  
Cdh2 cadherin 2 83501 ENSRNOG00000015602  
Ephb1 Eph receptor B1 24338 ENSRNOG00000007865  
Epha4 Eph receptor A4 316539 ENSRNOG00000013213  
Myo9b myosin IXb 25486 ENSRNOG00000016256  
Egfr epidermal growth factor receptor 24329 ENSRNOG00000004332  
Ptk2 PTK2 protein tyrosine kinase 2 25614 ENSRNOG00000007916  
Dcdc2 doublecortin domain containing 2 291130 ENSRNOG00000017511

biological process locomotion

C=937;O=11;E=3.45;R=3.19;rawP=0.0005;adjP=0.0114

Cdh2 NA  
Ddr2 NA  
Ephb1 NA  
Epha4 NA  
Myo9b NA  
Egfr NA  
Ptk2 NA  
Nrg1 NA  
Plau NA  
Dcdc2 NA  
Vcl NA

GO:0040011

Cdh2 cadherin 2 83501 ENSRNOG00000015602  
Ddr2 discoidin domain receptor tyrosine kinase 2 685781 ENSRNOG00000002881  
Ephb1 Eph receptor B1 24338 ENSRNOG00000007865  
Epha4 Eph receptor A4 316539 ENSRNOG00000013213  
Myo9b myosin IXb 25486 ENSRNOG00000016256  
Egfr epidermal growth factor receptor 24329 ENSRNOG00000004332  
Ptk2 PTK2 protein tyrosine kinase 2 25614 ENSRNOG00000007916  
Nrg1 neuregulin 1 112400 ENSRNOG00000010392  
Plau plasminogen activator, urokinase 25619 ENSRNOG00000010516  
Dcdc2 doublecortin domain containing 2 291130 ENSRNOG00000017511  
Vcl vinculin 305679 ENSRNOG00000010765

biological process regulation of axonogenesis

C=101;O=4;E=0.37;R=10.75;rawP=0.0005;adjP=0.0114

Cacna1a NA  
Cdh2 NA  
Epha4 NA  
Ptk2 NA

GO:0050770

Cacna1a calcium channel, voltage-dependent, P/Q type, alpha 1A subunit 25398 ENSRNOG00000002559  
Cdh2 cadherin 2 83501 ENSRNOG00000015602  
Epha4 Eph receptor A4 316539 ENSRNOG00000013213  
Ptk2 PTK2 protein tyrosine kinase 2 25614 ENSRNOG00000007916

biological process regulation of signaling

C=1791;O=16;E=6.60;R=2.42;rawP=0.0005;adjP=0.0114

GO:0023051

|         |    |         |                                                                |        |                    |
|---------|----|---------|----------------------------------------------------------------|--------|--------------------|
| Cacna1a | NA | Cacna1a | calcium channel, voltage-dependent, P/Q type, alpha 1A subunit | 25398  | ENSRNOG00000002559 |
| Cdh2    | NA | Cdh2    | cadherin 2                                                     | 83501  | ENSRNOG00000015602 |
| Ephb1   | NA | Ephb1   | Eph receptor B1                                                | 24338  | ENSRNOG00000007865 |
| Myo9b   | NA | Myo9b   | myosin IXb                                                     | 25486  | ENSRNOG00000016256 |
| Gria4   | NA | Gria4   | glutamate receptor, ionotropic, AMPA 4                         | 29629  | ENSRNOG00000006957 |
| Camk2g  | NA | Camk2g  | calcium/calmodulin-dependent protein kinase II gamma           | 171140 | ENSRNOG00000009783 |
| Plau    | NA | Plau    | plasminogen activator, urokinase                               | 25619  | ENSRNOG00000010516 |
| Sall1   | NA | Sall1   | sal-like 1 (Drosophila)                                        | 307740 | NULL               |
| Cyth1   | NA | Cyth1   | cytohesin 1                                                    | 116691 | ENSRNOG00000043381 |
| Epha4   | NA | Epha4   | Eph receptor A4                                                | 316539 | ENSRNOG00000013213 |
| Ppp3cb  | NA | Ppp3cb  | protein phosphatase 3, catalytic subunit, beta isozyme         | 24675  | ENSRNOG00000007757 |
| Egfr    | NA | Egfr    | epidermal growth factor receptor                               | 24329  | ENSRNOG00000004332 |
| Nrg1    | NA | Nrg1    | neuregulin 1                                                   | 112400 | ENSRNOG00000010392 |
| Ptk2    | NA | Ptk2    | PTK2 protein tyrosine kinase 2                                 | 25614  | ENSRNOG00000007916 |
| Rheb    | NA | Rheb    | Ras homolog enriched in brain                                  | 26954  | NULL               |
| Uaca    | NA | Uaca    | uveal autoantigen with coiled-coil domains and ankyrin repeats | 315732 | NULL               |

biological process neuron projection morphogenesis

C=396;O=7;E=1.46;R=4.80;rawP=0.0006;adjP=0.0129

|         |    |         |                                                                |        |                    |
|---------|----|---------|----------------------------------------------------------------|--------|--------------------|
| Cacna1a | NA | Cacna1a | calcium channel, voltage-dependent, P/Q type, alpha 1A subunit | 25398  | ENSRNOG00000002559 |
| Egfr    | NA | Egfr    | epidermal growth factor receptor                               | 24329  | ENSRNOG00000004332 |
| Cdh2    | NA | Cdh2    | cadherin 2                                                     | 83501  | ENSRNOG00000015602 |
| Ephb1   | NA | Ephb1   | Eph receptor B1                                                | 24338  | ENSRNOG00000007865 |
| Epha4   | NA | Epha4   | Eph receptor A4                                                | 316539 | ENSRNOG00000013213 |
| Ptk2    | NA | Ptk2    | PTK2 protein tyrosine kinase 2                                 | 25614  | ENSRNOG00000007916 |
| Dcdc2   | NA | Dcdc2   | doublecortin domain containing 2                               | 291130 | ENSRNOG00000017511 |

biological process localization

C=3501;O=24;E=12.90;R=1.86;rawP=0.0006;adjP=0.0129

|         |    |         |                                                                |        |                    |
|---------|----|---------|----------------------------------------------------------------|--------|--------------------|
| Cacna1a | NA | Cacna1a | calcium channel, voltage-dependent, P/Q type, alpha 1A subunit | 25398  | ENSRNOG00000002559 |
| Cdh2    | NA | Cdh2    | cadherin 2                                                     | 83501  | ENSRNOG00000015602 |
| Ddr2    | NA | Ddr2    | discoidin domain receptor tyrosine kinase 2                    | 685781 | ENSRNOG00000002881 |
| Ephb1   | NA | Ephb1   | Eph receptor B1                                                | 24338  | ENSRNOG00000007865 |
| Sec24c  | NA | Sec24c  | SEC24 family, member C (S. cerevisiae)                         | 685144 | ENSRNOG00000009042 |
| Brca2   | NA | Brca2   | breast cancer 2                                                | 360254 | ENSRNOG00000001111 |
| Myo9b   | NA | Myo9b   | myosin IXb                                                     | 25486  | ENSRNOG00000016256 |
| Elmo1   | NA | Elmo1   | engulfment and cell motility 1                                 | 361251 | ENSRNOG00000018726 |
| Camk2g  | NA | Camk2g  | calcium/calmodulin-dependent protein kinase II gamma           | 171140 | ENSRNOG00000009783 |

|        |    |        |                                                                |        |                     |
|--------|----|--------|----------------------------------------------------------------|--------|---------------------|
| Plau   | NA | Plau   | plasminogen activator, urokinase                               | 25619  | ENSRNOG00000010516  |
| Dcdc2  | NA | Dcdc2  | doublecortin domain containing 2                               | 291130 | ENSRNOG00000017511  |
| Vcl    | NA | Vcl    | vinculin                                                       | 305679 | ENSRNOG00000010765  |
| Tbc1d1 | NA | Tbc1d1 | TBC1 (tre-2/USP6, BUB2, cdc16) domain family, member 1         | 360937 | ENSRNOG00000002180  |
| Kcnt2  | NA | Kcnt2  | potassium channel, subfamily T, member 2                       | 304827 | ENSRNOG00000013312  |
| Stab2  | NA | Stab2  | stabilin 2                                                     | 282580 | NULL                |
| Itln1  | NA | Itln1  | intelectin 1 (galactofuranose binding)                         | 498284 | ENSRNOG00000004678  |
| Ppp3cb | NA | Ppp3cb | protein phosphatase 3, catalytic subunit, beta isozyme         | 24675  | ENSRNOG00000007757  |
| Epha4  | NA | Epha4  | Eph receptor A4                                                | 316539 | ENSRNOG00000013213  |
| Cyth1  | NA | Cyth1  | cytohesin 1                                                    | 116691 | ENSRNOG000000043381 |
| Ccdc91 | NA | Ccdc91 | coiled-coil domain containing 91                               | 312863 | NULL                |
| Egfr   | NA | Egfr   | epidermal growth factor receptor                               | 24329  | ENSRNOG00000004332  |
| Nrg1   | NA | Nrg1   | neuregulin 1                                                   | 112400 | ENSRNOG00000010392  |
| Ptk2   | NA | Ptk2   | PTK2 protein tyrosine kinase 2                                 | 25614  | ENSRNOG00000007916  |
| Uaca   | NA | Uaca   | uveal autoantigen with coiled-coil domains and ankyrin repeats | 315732 | NULL                |

biological process Ras protein signal transduction  
C=292;O=6;E=1.08;R=5.58;rawP=0.0007;adjP=0.0142

GO:0007265

|       |    |       |                                |        |                     |
|-------|----|-------|--------------------------------|--------|---------------------|
| Elmo1 | NA | Elmo1 | engulfment and cell motility 1 | 361251 | ENSRNOG00000018726  |
| Cdh2  | NA | Cdh2  | cadherin 2                     | 83501  | ENSRNOG00000015602  |
| Epha4 | NA | Epha4 | Eph receptor A4                | 316539 | ENSRNOG00000013213  |
| Nrg1  | NA | Nrg1  | neuregulin 1                   | 112400 | ENSRNOG00000010392  |
| Cyth1 | NA | Cyth1 | cytohesin 1                    | 116691 | ENSRNOG000000043381 |
| Myo9b | NA | Myo9b | myosin IXb                     | 25486  | ENSRNOG00000016256  |

biological process cellular component morphogenesis  
C=820;O=10;E=3.02;R=3.31;rawP=0.0007;adjP=0.0142

GO:0032989

|         |    |         |                                                                |        |                    |
|---------|----|---------|----------------------------------------------------------------|--------|--------------------|
| Cacna1a | NA | Cacna1a | calcium channel, voltage-dependent, P/Q type, alpha 1A subunit | 25398  | ENSRNOG00000002559 |
| Cdh2    | NA | Cdh2    | cadherin 2                                                     | 83501  | ENSRNOG00000015602 |
| Ephb1   | NA | Ephb1   | Eph receptor B1                                                | 24338  | ENSRNOG00000007865 |
| Epha4   | NA | Epha4   | Eph receptor A4                                                | 316539 | ENSRNOG00000013213 |
| Myo9b   | NA | Myo9b   | myosin IXb                                                     | 25486  | ENSRNOG00000016256 |
| Egfr    | NA | Egfr    | epidermal growth factor receptor                               | 24329  | ENSRNOG00000004332 |
| Ptk2    | NA | Ptk2    | PTK2 protein tyrosine kinase 2                                 | 25614  | ENSRNOG00000007916 |
| Nrg1    | NA | Nrg1    | neuregulin 1                                                   | 112400 | ENSRNOG00000010392 |
| Dcdc2   | NA | Dcdc2   | doublecortin domain containing 2                               | 291130 | ENSRNOG00000017511 |
| Sall1   | NA | Sall1   | sal-like 1 (Drosophila)                                        | 307740 | NULL               |

|                                                 |                                   |            |                                                                |                           |
|-------------------------------------------------|-----------------------------------|------------|----------------------------------------------------------------|---------------------------|
| biological process                              | cellular anion homeostasis        | GO:0030002 |                                                                |                           |
| C=12;O=2;E=0.04;R=45.24;rawP=0.0009;adjP=0.0177 |                                   |            |                                                                |                           |
| Cacna1a                                         | NA                                | Cacna1a    | calcium channel, voltage-dependent, P/Q type, alpha 1A subunit | 25398 ENSRNOG00000002559  |
| Ptk2                                            | NA                                | Ptk2       | PTK2 protein tyrosine kinase 2                                 | 25614 ENSRNOG00000007916  |
| biological process                              | peptidyl-tyrosine modification    | GO:0018212 |                                                                |                           |
| C=211;O=5;E=0.78;R=6.43;rawP=0.0010;adjP=0.0187 |                                   |            |                                                                |                           |
| Egfr                                            | NA                                | Egfr       | epidermal growth factor receptor                               | 24329 ENSRNOG00000004332  |
| Ddr2                                            | NA                                | Ddr2       | discoidin domain receptor tyrosine kinase 2                    | 685781 ENSRNOG00000002881 |
| Epha4                                           | NA                                | Epha4      | Eph receptor A4                                                | 316539 ENSRNOG00000013213 |
| Nrg1                                            | NA                                | Nrg1       | neuregulin 1                                                   | 112400 ENSRNOG00000010392 |
| Ptk2                                            | NA                                | Ptk2       | PTK2 protein tyrosine kinase 2                                 | 25614 ENSRNOG00000007916  |
| biological process                              | peptidyl-tyrosine phosphorylation | GO:0018108 |                                                                |                           |
| C=209;O=5;E=0.77;R=6.49;rawP=0.0010;adjP=0.0187 |                                   |            |                                                                |                           |
| Egfr                                            | NA                                | Egfr       | epidermal growth factor receptor                               | 24329 ENSRNOG00000004332  |
| Ddr2                                            | NA                                | Ddr2       | discoidin domain receptor tyrosine kinase 2                    | 685781 ENSRNOG00000002881 |
| Epha4                                           | NA                                | Epha4      | Eph receptor A4                                                | 316539 ENSRNOG00000013213 |
| Nrg1                                            | NA                                | Nrg1       | neuregulin 1                                                   | 112400 ENSRNOG00000010392 |
| Ptk2                                            | NA                                | Ptk2       | PTK2 protein tyrosine kinase 2                                 | 25614 ENSRNOG00000007916  |
| biological process                              | regulation of catabolic process   | GO:0009894 |                                                                |                           |
| C=442;O=7;E=1.63;R=4.30;rawP=0.0011;adjP=0.0195 |                                   |            |                                                                |                           |
| Egfr                                            | NA                                | Egfr       | epidermal growth factor receptor                               | 24329 ENSRNOG00000004332  |
| Epha4                                           | NA                                | Epha4      | Eph receptor A4                                                | 316539 ENSRNOG00000013213 |
| Nrg1                                            | NA                                | Nrg1       | neuregulin 1                                                   | 112400 ENSRNOG00000010392 |
| Ptk2                                            | NA                                | Ptk2       | PTK2 protein tyrosine kinase 2                                 | 25614 ENSRNOG00000007916  |
| Myo9b                                           | NA                                | Myo9b      | myosin IXb                                                     | 25486 ENSRNOG00000016256  |
| Uaca                                            | NA                                | Uaca       | uveal autoantigen with coiled-coil domains and ankyrin repeats | 315732 NULL               |
| Scoc                                            | NA                                | Scoc       | short coiled-coil protein                                      | 364981 ENSRNOG00000003853 |
| biological process                              | neuron differentiation            | GO:0030182 |                                                                |                           |

C=868;O=10;E=3.20;R=3.13;rawP=0.0011;adjP=0.0195

|          |    |          |                                                                |        |                    |
|----------|----|----------|----------------------------------------------------------------|--------|--------------------|
| Cacna1a  | NA | Cacna1a  | calcium channel, voltage-dependent, P/Q type, alpha 1A subunit | 25398  | ENSRNOG00000002559 |
| Cdh2     | NA | Cdh2     | cadherin 2                                                     | 83501  | ENSRNOG00000015602 |
| Ephb1    | NA | Ephb1    | Eph receptor B1                                                | 24338  | ENSRNOG00000007865 |
| Epha4    | NA | Epha4    | Eph receptor A4                                                | 316539 | ENSRNOG00000013213 |
| Egfr     | NA | Egfr     | epidermal growth factor receptor                               | 24329  | ENSRNOG00000004332 |
| Ptk2     | NA | Ptk2     | PTK2 protein tyrosine kinase 2                                 | 25614  | ENSRNOG00000007916 |
| Nrg1     | NA | Nrg1     | neuregulin 1                                                   | 112400 | ENSRNOG00000010392 |
| Cdk5rap1 | NA | Cdk5rap1 | CDK5 regulatory subunit associated protein 1                   | 252827 | ENSRNOG00000015696 |
| Dcdc2    | NA | Dcdc2    | doublecortin domain containing 2                               | 291130 | ENSRNOG00000017511 |
| Sall1    | NA | Sall1    | sal-like 1 (Drosophila)                                        | 307740 | NULL               |

molecular function transmembrane receptor protein tyrosine kinase activity

C=55;O=4;E=0.19;R=21.03;rawP=3.79e-05;adjP=0.0021

GO:0004714

|       |    |       |                                             |        |                    |
|-------|----|-------|---------------------------------------------|--------|--------------------|
| Egfr  | NA | Egfr  | epidermal growth factor receptor            | 24329  | ENSRNOG00000004332 |
| Ddr2  | NA | Ddr2  | discoidin domain receptor tyrosine kinase 2 | 685781 | ENSRNOG00000002881 |
| Ephb1 | NA | Ephb1 | Eph receptor B1                             | 24338  | ENSRNOG00000007865 |
| Epha4 | NA | Epha4 | Eph receptor A4                             | 316539 | ENSRNOG00000013213 |

molecular function transferase activity

C=1632;O=16;E=5.64;R=2.84;rawP=7.46e-05;adjP=0.0021

GO:0016740

|            |    |            |                                                           |        |                     |
|------------|----|------------|-----------------------------------------------------------|--------|---------------------|
| Fut11      | NA | Fut11      | fucosyltransferase 11 (alpha (1,3) fucosyltransferase)    | 286971 | ENSRNOG00000009274  |
| Ddr2       | NA | Ddr2       | discoidin domain receptor tyrosine kinase 2               | 685781 | ENSRNOG00000002881  |
| Ephb1      | NA | Ephb1      | Eph receptor B1                                           | 24338  | ENSRNOG00000007865  |
| Brca2      | NA | Brca2      | breast cancer 2                                           | 360254 | ENSRNOG00000001111  |
| LOC685793  | NA | LOC685793  | similar to serine/threonine kinase                        | 685793 | ENSRNOG000000030545 |
| Ndst2      | NA | Ndst2      | N-deacetylase/N-sulfotransferase (heparan glucosaminyl) 2 | 114002 | ENSRNOG000000027171 |
| Camk2g     | NA | Camk2g     | calcium/calmodulin-dependent protein kinase II gamma      | 171140 | ENSRNOG00000009783  |
| Plau       | NA | Plau       | plasminogen activator, urokinase                          | 25619  | ENSRNOG00000010516  |
| Epha4      | NA | Epha4      | Eph receptor A4                                           | 316539 | ENSRNOG00000013213  |
| Gtdc1      | NA | Gtdc1      | glycosyltransferase-like domain containing 1              | 362129 | ENSRNOG000000031038 |
| Cers4      | NA | Cers4      | ceramide synthase 4                                       | 304208 | ENSRNOG00000001072  |
| Egfr       | NA | Egfr       | epidermal growth factor receptor                          | 24329  | ENSRNOG00000004332  |
| RGD1310572 | NA | RGD1310572 | similar to calmegin                                       | 304646 | ENSRNOG00000003695  |
| Ptk2       | NA | Ptk2       | PTK2 protein tyrosine kinase 2                            | 25614  | ENSRNOG00000007916  |
| Cdk5rap1   | NA | Cdk5rap1   | CDK5 regulatory subunit associated protein 1              | 252827 | ENSRNOG00000015696  |
| Galk2      | NA | Galk2      | galactokinase 2                                           | 296117 | ENSRNOG00000009289  |

|                                                    |                                  |            |                                             |                           |
|----------------------------------------------------|----------------------------------|------------|---------------------------------------------|---------------------------|
| molecular function                                 | protein tyrosine kinase activity | GO:0004713 |                                             |                           |
| C=120;O=5;E=0.41;R=12.05;rawP=5.69e-05;adjP=0.0021 |                                  |            |                                             |                           |
| Egfr                                               | NA                               | Egfr       | epidermal growth factor receptor            | 24329 ENSRNOG00000004332  |
| Ddr2                                               | NA                               | Ddr2       | discoidin domain receptor tyrosine kinase 2 | 685781 ENSRNOG00000002881 |
| Ephb1                                              | NA                               | Ephb1      | Eph receptor B1                             | 24338 ENSRNOG00000007865  |
| Epha4                                              | NA                               | Epha4      | Eph receptor A4                             | 316539 ENSRNOG00000013213 |
| Ptk2                                               | NA                               | Ptk2       | PTK2 protein tyrosine kinase 2              | 25614 ENSRNOG00000007916  |

|                                                   |                                        |            |                 |                           |
|---------------------------------------------------|----------------------------------------|------------|-----------------|---------------------------|
| molecular function                                | transmembrane-ephrin receptor activity | GO:0005005 |                 |                           |
| C=4;O=2;E=0.01;R=144.61;rawP=7.00e-05;adjP=0.0021 |                                        |            |                 |                           |
| Ephb1                                             | NA                                     | Ephb1      | Eph receptor B1 | 24338 ENSRNOG00000007865  |
| Epha4                                             | NA                                     | Epha4      | Eph receptor A4 | 316539 ENSRNOG00000013213 |

|                                                   |                                                |            |                                             |                           |
|---------------------------------------------------|------------------------------------------------|------------|---------------------------------------------|---------------------------|
| molecular function                                | transmembrane receptor protein kinase activity | GO:0019199 |                                             |                           |
| C=70;O=4;E=0.24;R=16.53;rawP=9.80e-05;adjP=0.0022 |                                                |            |                                             |                           |
| Egfr                                              | NA                                             | Egfr       | epidermal growth factor receptor            | 24329 ENSRNOG00000004332  |
| Ddr2                                              | NA                                             | Ddr2       | discoidin domain receptor tyrosine kinase 2 | 685781 ENSRNOG00000002881 |
| Ephb1                                             | NA                                             | Ephb1      | Eph receptor B1                             | 24338 ENSRNOG00000007865  |
| Epha4                                             | NA                                             | Epha4      | Eph receptor A4                             | 316539 ENSRNOG00000013213 |

|                                                |                       |            |            |                           |
|------------------------------------------------|-----------------------|------------|------------|---------------------------|
| molecular function                             | alpha-catenin binding | GO:0045294 |            |                           |
| C=7;O=2;E=0.02;R=82.63;rawP=0.0002;adjP=0.0038 |                       |            |            |                           |
| Cdh2                                           | NA                    | Cdh2       | cadherin 2 | 83501 ENSRNOG00000015602  |
| Vcl                                            | NA                    | Vcl        | vinculin   | 305679 ENSRNOG00000010765 |

|                                                 |                    |            |                                                                |                           |
|-------------------------------------------------|--------------------|------------|----------------------------------------------------------------|---------------------------|
| molecular function                              | calmodulin binding | GO:0005516 |                                                                |                           |
| C=117;O=4;E=0.40;R=9.89;rawP=0.0007;adjP=0.0114 |                    |            |                                                                |                           |
| Cacna1a                                         | NA                 | Cacna1a    | calcium channel, voltage-dependent, P/Q type, alpha 1A subunit | 25398 ENSRNOG00000002559  |
| Ppp3cb                                          | NA                 | Ppp3cb     | protein phosphatase 3, catalytic subunit, beta isozyme         | 24675 ENSRNOG00000007757  |
| Camk2g                                          | NA                 | Camk2g     | calcium/calmodulin-dependent protein kinase II gamma           | 171140 ENSRNOG00000009783 |
| Myo9b                                           | NA                 | Myo9b      | myosin IXb                                                     | 25486 ENSRNOG00000016256  |

molecular function kinase activity  
C=754;O=9;E=2.61;R=3.45;rawP=0.0010;adjP=0.0127

GO:0016301

|           |    |           |                                                      |        |                    |
|-----------|----|-----------|------------------------------------------------------|--------|--------------------|
| Ddr2      | NA | Ddr2      | discoidin domain receptor tyrosine kinase 2          | 685781 | ENSRNOG00000002881 |
| Ephb1     | NA | Ephb1     | Eph receptor B1                                      | 24338  | ENSRNOG00000007865 |
| Epha4     | NA | Epha4     | Eph receptor A4                                      | 316539 | ENSRNOG00000013213 |
| LOC685793 | NA | LOC685793 | similar to serine/threonine kinase                   | 685793 | ENSRNOG00000030545 |
| Egfr      | NA | Egfr      | epidermal growth factor receptor                     | 24329  | ENSRNOG00000004332 |
| Ptk2      | NA | Ptk2      | PTK2 protein tyrosine kinase 2                       | 25614  | ENSRNOG00000007916 |
| Plau      | NA | Plau      | plasminogen activator, urokinase                     | 25619  | ENSRNOG00000010516 |
| Camk2g    | NA | Camk2g    | calcium/calmodulin-dependent protein kinase II gamma | 171140 | ENSRNOG00000009783 |
| Galk2     | NA | Galk2     | galactokinase 2                                      | 296117 | ENSRNOG00000009289 |

molecular function ephrin receptor activity  
C=13;O=2;E=0.04;R=44.50;rawP=0.0009;adjP=0.0127

GO:0005003

|       |    |       |                 |        |                    |
|-------|----|-------|-----------------|--------|--------------------|
| Ephb1 | NA | Ephb1 | Eph receptor B1 | 24338  | ENSRNOG00000007865 |
| Epha4 | NA | Epha4 | Eph receptor A4 | 316539 | ENSRNOG00000013213 |

molecular function phosphotransferase activity, alcohol group as acceptor  
C=688;O=8;E=2.38;R=3.36;rawP=0.0023;adjP=0.0237

GO:0016773

|           |    |           |                                                      |        |                    |
|-----------|----|-----------|------------------------------------------------------|--------|--------------------|
| Ddr2      | NA | Ddr2      | discoidin domain receptor tyrosine kinase 2          | 685781 | ENSRNOG00000002881 |
| Ephb1     | NA | Ephb1     | Eph receptor B1                                      | 24338  | ENSRNOG00000007865 |
| Epha4     | NA | Epha4     | Eph receptor A4                                      | 316539 | ENSRNOG00000013213 |
| LOC685793 | NA | LOC685793 | similar to serine/threonine kinase                   | 685793 | ENSRNOG00000030545 |
| Egfr      | NA | Egfr      | epidermal growth factor receptor                     | 24329  | ENSRNOG00000004332 |
| Ptk2      | NA | Ptk2      | PTK2 protein tyrosine kinase 2                       | 25614  | ENSRNOG00000007916 |
| Camk2g    | NA | Camk2g    | calcium/calmodulin-dependent protein kinase II gamma | 171140 | ENSRNOG00000009783 |
| Galk2     | NA | Galk2     | galactokinase 2                                      | 296117 | ENSRNOG00000009289 |

molecular function transferase activity, transferring phosphorus-containing groups  
C=871;O=9;E=3.01;R=2.99;rawP=0.0027;adjP=0.0237

GO:0016772

|           |    |           |                                             |        |                    |
|-----------|----|-----------|---------------------------------------------|--------|--------------------|
| Ddr2      | NA | Ddr2      | discoidin domain receptor tyrosine kinase 2 | 685781 | ENSRNOG00000002881 |
| Ephb1     | NA | Ephb1     | Eph receptor B1                             | 24338  | ENSRNOG00000007865 |
| Epha4     | NA | Epha4     | Eph receptor A4                             | 316539 | ENSRNOG00000013213 |
| LOC685793 | NA | LOC685793 | similar to serine/threonine kinase          | 685793 | ENSRNOG00000030545 |
| Egfr      | NA | Egfr      | epidermal growth factor receptor            | 24329  | ENSRNOG00000004332 |

|        |    |        |                                                      |        |                    |
|--------|----|--------|------------------------------------------------------|--------|--------------------|
| Ptk2   | NA | Ptk2   | PTK2 protein tyrosine kinase 2                       | 25614  | ENSRNOG00000007916 |
| Plau   | NA | Plau   | plasminogen activator, urokinase                     | 25619  | ENSRNOG00000010516 |
| Camk2g | NA | Camk2g | calcium/calmodulin-dependent protein kinase II gamma | 171140 | ENSRNOG00000009783 |
| Galk2  | NA | Galk2  | galactokinase 2                                      | 296117 | ENSRNOG00000009289 |

molecular function Ras GTPase activator activity  
C=78;O=3;E=0.27;R=11.12;rawP=0.0025;adjP=0.0237

GO:0005099

|        |    |        |                                                        |        |                    |
|--------|----|--------|--------------------------------------------------------|--------|--------------------|
| Tbc1d1 | NA | Tbc1d1 | TBC1 (tre-2/USP6, BUB2, cdc16) domain family, member 1 | 360937 | ENSRNOG00000002180 |
| Myo9b  | NA | Myo9b  | myosin IXb                                             | 25486  | ENSRNOG00000016256 |
| Tbc1d5 | NA | Tbc1d5 | TBC1 domain family, member 5                           | 501088 | ENSRNOG00000010637 |

molecular function protein phosphatase binding  
C=81;O=3;E=0.28;R=10.71;rawP=0.0027;adjP=0.0237

GO:0019903

|        |    |        |                                                        |       |                    |
|--------|----|--------|--------------------------------------------------------|-------|--------------------|
| Egfr   | NA | Egfr   | epidermal growth factor receptor                       | 24329 | ENSRNOG00000004332 |
| Cdh2   | NA | Cdh2   | cadherin 2                                             | 83501 | ENSRNOG00000015602 |
| Ppp3cb | NA | Ppp3cb | protein phosphatase 3, catalytic subunit, beta isozyme | 24675 | ENSRNOG00000007757 |

molecular function protein kinase activity  
C=583;O=7;E=2.02;R=3.47;rawP=0.0037;adjP=0.0301

GO:0004672

|           |    |           |                                                      |        |                    |
|-----------|----|-----------|------------------------------------------------------|--------|--------------------|
| Egfr      | NA | Egfr      | epidermal growth factor receptor                     | 24329  | ENSRNOG00000004332 |
| Ddr2      | NA | Ddr2      | discoidin domain receptor tyrosine kinase 2          | 685781 | ENSRNOG00000002881 |
| Ephb1     | NA | Ephb1     | Eph receptor B1                                      | 24338  | ENSRNOG00000007865 |
| Epha4     | NA | Epha4     | Eph receptor A4                                      | 316539 | ENSRNOG00000013213 |
| Camk2g    | NA | Camk2g    | calcium/calmodulin-dependent protein kinase II gamma | 171140 | ENSRNOG00000009783 |
| Ptk2      | NA | Ptk2      | PTK2 protein tyrosine kinase 2                       | 25614  | ENSRNOG00000007916 |
| LOC685793 | NA | LOC685793 | similar to serine/threonine kinase                   | 685793 | ENSRNOG00000030545 |

molecular function enzyme regulator activity  
C=787;O=8;E=2.72;R=2.94;rawP=0.0052;adjP=0.0395

GO:0030234

|          |    |          |                                              |        |                    |
|----------|----|----------|----------------------------------------------|--------|--------------------|
| Cyth1    | NA | Cyth1    | cytohesin 1                                  | 116691 | ENSRNOG00000043381 |
| Myo9b    | NA | Myo9b    | myosin IXb                                   | 25486  | ENSRNOG00000016256 |
| Tbc1d5   | NA | Tbc1d5   | TBC1 domain family, member 5                 | 501088 | ENSRNOG00000010637 |
| Egfr     | NA | Egfr     | epidermal growth factor receptor             | 24329  | ENSRNOG00000004332 |
| Nrg1     | NA | Nrg1     | neuregulin 1                                 | 112400 | ENSRNOG00000010392 |
| Cdk5rap1 | NA | Cdk5rap1 | CDK5 regulatory subunit associated protein 1 | 252827 | ENSRNOG00000015696 |



|        |    |        |                                                        |        |                    |
|--------|----|--------|--------------------------------------------------------|--------|--------------------|
| Mup5   | NA | Mup5   | major urinary protein 5                                | 298107 | ENSRNOG00000033130 |
| Tbc1d1 | NA | Tbc1d1 | TBC1 (tre-2/USP6, BUB2, cdc16) domain family, member 1 | 360937 | ENSRNOG00000002180 |

molecular function small GTPase regulator activity  
C=219;O=4;E=0.76;R=5.28;rawP=0.0068;adjP=0.0456

GO:0005083

|        |    |        |                                                        |        |                    |
|--------|----|--------|--------------------------------------------------------|--------|--------------------|
| Cyth1  | NA | Cyth1  | cytohesin 1                                            | 116691 | ENSRNOG00000043381 |
| Tbc1d1 | NA | Tbc1d1 | TBC1 (tre-2/USP6, BUB2, cdc16) domain family, member 1 | 360937 | ENSRNOG00000002180 |
| Myo9b  | NA | Myo9b  | myosin IXb                                             | 25486  | ENSRNOG00000016256 |
| Tbc1d5 | NA | Tbc1d5 | TBC1 domain family, member 5                           | 501088 | ENSRNOG00000010637 |

molecular function Rab GTPase activator activity  
C=35;O=2;E=0.12;R=16.53;rawP=0.0065;adjP=0.0456

GO:0005097

|        |    |        |                                                        |        |                    |
|--------|----|--------|--------------------------------------------------------|--------|--------------------|
| Tbc1d1 | NA | Tbc1d1 | TBC1 (tre-2/USP6, BUB2, cdc16) domain family, member 1 | 360937 | ENSRNOG00000002180 |
| Tbc1d5 | NA | Tbc1d5 | TBC1 domain family, member 5                           | 501088 | ENSRNOG00000010637 |

cellular component cell part  
C=11952;O=52;E=42.66;R=1.22;rawP=0.0006;adjP=0.0198

GO:0044464

|         |    |         |                                                                |        |                     |
|---------|----|---------|----------------------------------------------------------------|--------|---------------------|
| Cacna1a | NA | Cacna1a | calcium channel, voltage-dependent, P/Q type, alpha 1A subunit | 25398  | ENSRNOG00000002559  |
| Ephb1   | NA | Ephb1   | Eph receptor B1                                                | 24338  | ENSRNOG00000007865  |
| Elmo1   | NA | Elmo1   | engulfment and cell motility 1                                 | 361251 | ENSRNOG00000018726  |
| Ndst2   | NA | Ndst2   | N-deacetylase/N-sulfotransferase (heparan glucosaminyl) 2      | 114002 | ENSRNOG000000027171 |
| Gria4   | NA | Gria4   | glutamate receptor, ionotropic, AMPA 4                         | 29629  | ENSRNOG00000006957  |
| Hmbox1  | NA | Hmbox1  | homeobox containing 1                                          | 305968 | ENSRNOG00000013326  |
| Clgn    | NA | Clgn    | calmegin                                                       | 685504 | ENSRNOG00000003755  |
| Cyth1   | NA | Cyth1   | cytohesin 1                                                    | 116691 | ENSRNOG00000043381  |
| Scoc    | NA | Scoc    | short coiled-coil protein                                      | 364981 | ENSRNOG00000003853  |
| Glcci1  | NA | Glcci1  | glucocorticoid induced transcript 1                            | 500026 | NULL                |
| Egfr    | NA | Egfr    | epidermal growth factor receptor                               | 24329  | ENSRNOG00000004332  |
| Hormad2 | NA | Hormad2 | HORMA domain containing 2                                      | 498400 | ENSRNOG000000037865 |
| Ptk2    | NA | Ptk2    | PTK2 protein tyrosine kinase 2                                 | 25614  | ENSRNOG00000007916  |
| Nrg1    | NA | Nrg1    | neuregulin 1                                                   | 112400 | ENSRNOG00000010392  |
| Galk2   | NA | Galk2   | galactokinase 2                                                | 296117 | ENSRNOG00000009289  |
| Uaca    | NA | Uaca    | uveal autoantigen with coiled-coil domains and ankyrin repeats | 315732 | NULL                |
| Fut11   | NA | Fut11   | fucosyltransferase 11 (alpha (1,3) fucosyltransferase)         | 286971 | ENSRNOG00000009274  |
| Ddr2    | NA | Ddr2    | discoïdin domain receptor tyrosine kinase 2                    | 685781 | ENSRNOG00000002881  |
| Cdh2    | NA | Cdh2    | cadherin 2                                                     | 83501  | ENSRNOG00000015602  |

|           |    |           |                                                                          |        |                     |
|-----------|----|-----------|--------------------------------------------------------------------------|--------|---------------------|
| Emr4      | NA | Emr4      | EGF-like module containing, mucin-like, hormone receptor-like sequence 4 | 450235 | NULL                |
| Ccdc15    | NA | Ccdc15    | coiled-coil domain containing 15                                         | 367056 | ENSRNOG00000032180  |
| Brca2     | NA | Brca2     | breast cancer 2                                                          | 360254 | ENSRNOG00000001111  |
| Sec24c    | NA | Sec24c    | SEC24 family, member C ( <i>S. cerevisiae</i> )                          | 685144 | ENSRNOG00000009042  |
| Myo9b     | NA | Myo9b     | myosin IXb                                                               | 25486  | ENSRNOG00000016256  |
| Tbc1d5    | NA | Tbc1d5    | TBC1 domain family, member 5                                             | 501088 | ENSRNOG00000010637  |
| Sdccag8   | NA | Sdccag8   | serologically defined colon cancer antigen 8                             | 305002 | ENSRNOG00000004181  |
| Arid2     | NA | Arid2     | AT rich interactive domain 2 (Arid-rfx like)                             | 366980 | ENSRNOG00000004831  |
| Plau      | NA | Plau      | plasminogen activator, urokinase                                         | 25619  | ENSRNOG00000010516  |
| Camk2g    | NA | Camk2g    | calcium/calmodulin-dependent protein kinase II gamma                     | 171140 | ENSRNOG00000009783  |
| Dcdc2     | NA | Dcdc2     | doublecortin domain containing 2                                         | 291130 | ENSRNOG00000017511  |
| Chchd1    | NA | Chchd1    | coiled-coil-helix-coiled-coil-helix domain containing 1                  | 361005 | ENSRNOG00000009297  |
| Vcl       | NA | Vcl       | vinculin                                                                 | 305679 | ENSRNOG00000010765  |
| Tbc1d1    | NA | Tbc1d1    | TBC1 (tre-2/USP6, BUB2, cdc16) domain family, member 1                   | 360937 | ENSRNOG00000002180  |
| Kcnt2     | NA | Kcnt2     | potassium channel, subfamily T, member 2                                 | 304827 | ENSRNOG00000013312  |
| Kdm4c     | NA | Kdm4c     | lysine (K)-specific demethylase 4C                                       | 298144 | ENSRNOG00000006644  |
| Sall1     | NA | Sall1     | sal-like 1 ( <i>Drosophila</i> )                                         | 307740 | NULL                |
| Cdh19     | NA | Cdh19     | cadherin 19, type 2                                                      | 360835 | ENSRNOG00000029841  |
| Stab2     | NA | Stab2     | stabilin 2                                                               | 282580 | NULL                |
| Itln1     | NA | Itln1     | intelectin 1 (galactofuranose binding)                                   | 498284 | ENSRNOG00000004678  |
| Ppp3cb    | NA | Ppp3cb    | protein phosphatase 3, catalytic subunit, beta isozyme                   | 24675  | ENSRNOG00000007757  |
| Pgm2      | NA | Pgm2      | phosphoglucomutase 2                                                     | 289632 | NULL                |
| Epha4     | NA | Epha4     | Eph receptor A4                                                          | 316539 | ENSRNOG00000013213  |
| Cers4     | NA | Cers4     | ceramide synthase 4                                                      | 304208 | ENSRNOG00000001072  |
| Lpin2     | NA | Lpin2     | lipin 2                                                                  | 316737 | ENSRNOG00000014876  |
| Vom2r37   | NA | Vom2r37   | vomeronasal 2 receptor, 37                                               | 690356 | ENSRNOG00000043280  |
| Ccdc91    | NA | Ccdc91    | coiled-coil domain containing 91                                         | 312863 | NULL                |
| Ankrd32   | NA | Ankrd32   | ankyrin repeat domain 32                                                 | 294601 | ENSRNOG000000040279 |
| Cdk5rap1  | NA | Cdk5rap1  | CDK5 regulatory subunit associated protein 1                             | 252827 | ENSRNOG00000015696  |
| LOC688241 | NA | LOC688241 | similar to GTPase activating protein testicular GAP1                     | 688241 | NULL                |
| Tecr      | NA | Tecr      | trans-2,3-enoyl-CoA reductase                                            | 191576 | ENSRNOG000000021808 |
| Cpne5     | NA | Cpne5     | copine V                                                                 | 309650 | ENSRNOG00000000522  |
| Rheb      | NA | Rheb      | Ras homolog enriched in brain                                            | 26954  | NULL                |

cellular component cell

C=11953;O=52;E=42.66;R=1.22;rawP=0.0007;adjP=0.0198

GO:0005623

|         |    |         |                                                                |        |                    |
|---------|----|---------|----------------------------------------------------------------|--------|--------------------|
| Cacna1a | NA | Cacna1a | calcium channel, voltage-dependent, P/Q type, alpha 1A subunit | 25398  | ENSRNOG00000002559 |
| Ephb1   | NA | Ephb1   | Eph receptor B1                                                | 24338  | ENSRNOG00000007865 |
| Elmo1   | NA | Elmo1   | engulfment and cell motility 1                                 | 361251 | ENSRNOG00000018726 |

|         |    |         |                                                                          |        |                     |
|---------|----|---------|--------------------------------------------------------------------------|--------|---------------------|
| Ndst2   | NA | Ndst2   | N-deacetylase/N-sulfotransferase (heparan glucosaminyl) 2                | 114002 | ENSRNOG00000027171  |
| Gria4   | NA | Gria4   | glutamate receptor, ionotropic, AMPA 4                                   | 29629  | ENSRNOG00000006957  |
| Hmbox1  | NA | Hmbox1  | homeobox containing 1                                                    | 305968 | ENSRNOG00000013326  |
| Clgn    | NA | Clgn    | calmegin                                                                 | 685504 | ENSRNOG00000003755  |
| Cyth1   | NA | Cyth1   | cytohesin 1                                                              | 116691 | ENSRNOG000000043381 |
| Scoc    | NA | Scoc    | short coiled-coil protein                                                | 364981 | ENSRNOG00000003853  |
| Glccl1  | NA | Glccl1  | glucocorticoid induced transcript 1                                      | 500026 | NULL                |
| Egfr    | NA | Egfr    | epidermal growth factor receptor                                         | 24329  | ENSRNOG00000004332  |
| Hormad2 | NA | Hormad2 | HORMA domain containing 2                                                | 498400 | ENSRNOG000000037865 |
| Ptk2    | NA | Ptk2    | PTK2 protein tyrosine kinase 2                                           | 25614  | ENSRNOG00000007916  |
| Nrg1    | NA | Nrg1    | neuregulin 1                                                             | 112400 | ENSRNOG00000010392  |
| Galk2   | NA | Galk2   | galactokinase 2                                                          | 296117 | ENSRNOG00000009289  |
| Uaca    | NA | Uaca    | uveal autoantigen with coiled-coil domains and ankyrin repeats           | 315732 | NULL                |
| Fut11   | NA | Fut11   | fucosyltransferase 11 (alpha (1,3) fucosyltransferase)                   | 286971 | ENSRNOG00000009274  |
| Ddr2    | NA | Ddr2    | discoïdin domain receptor tyrosine kinase 2                              | 685781 | ENSRNOG00000002881  |
| Cdh2    | NA | Cdh2    | cadherin 2                                                               | 83501  | ENSRNOG00000015602  |
| Emr4    | NA | Emr4    | EGF-like module containing, mucin-like, hormone receptor-like sequence 4 | 450235 | NULL                |
| Ccdc15  | NA | Ccdc15  | coiled-coil domain containing 15                                         | 367056 | ENSRNOG000000032180 |
| Brca2   | NA | Brca2   | breast cancer 2                                                          | 360254 | ENSRNOG00000001111  |
| Sec24c  | NA | Sec24c  | SEC24 family, member C (S. cerevisiae)                                   | 685144 | ENSRNOG00000009042  |
| Myo9b   | NA | Myo9b   | myosin IXb                                                               | 25486  | ENSRNOG00000016256  |
| Tbc1d5  | NA | Tbc1d5  | TBC1 domain family, member 5                                             | 501088 | ENSRNOG00000010637  |
| Sdccag8 | NA | Sdccag8 | serologically defined colon cancer antigen 8                             | 305002 | ENSRNOG00000004181  |
| Arid2   | NA | Arid2   | AT rich interactive domain 2 (Arid-rfx like)                             | 366980 | ENSRNOG00000004831  |
| Plau    | NA | Plau    | plasminogen activator, urokinase                                         | 25619  | ENSRNOG00000010516  |
| Camk2g  | NA | Camk2g  | calcium/calmodulin-dependent protein kinase II gamma                     | 171140 | ENSRNOG00000009783  |
| Dcdc2   | NA | Dcdc2   | doublecortin domain containing 2                                         | 291130 | ENSRNOG00000017511  |
| Chchd1  | NA | Chchd1  | coiled-coil-helix-coiled-coil-helix domain containing 1                  | 361005 | ENSRNOG00000009297  |
| Vcl     | NA | Vcl     | vinculin                                                                 | 305679 | ENSRNOG00000010765  |
| Tbc1d1  | NA | Tbc1d1  | TBC1 (tre-2/USP6, BUB2, cdc16) domain family, member 1                   | 360937 | ENSRNOG00000002180  |
| Kcnt2   | NA | Kcnt2   | potassium channel, subfamily T, member 2                                 | 304827 | ENSRNOG00000013312  |
| Kdm4c   | NA | Kdm4c   | lysine (K)-specific demethylase 4C                                       | 298144 | ENSRNOG00000006644  |
| Sall1   | NA | Sall1   | sal-like 1 (Drosophila)                                                  | 307740 | NULL                |
| Cdh19   | NA | Cdh19   | cadherin 19, type 2                                                      | 360835 | ENSRNOG00000029841  |
| Stab2   | NA | Stab2   | stabilin 2                                                               | 282580 | NULL                |
| Itln1   | NA | Itln1   | intelectin 1 (galactofuranose binding)                                   | 498284 | ENSRNOG00000004678  |
| Ppp3cb  | NA | Ppp3cb  | protein phosphatase 3, catalytic subunit, beta isozyme                   | 24675  | ENSRNOG00000007757  |
| Pgm2    | NA | Pgm2    | phosphoglucomutase 2                                                     | 289632 | NULL                |
| Epha4   | NA | Epha4   | Eph receptor A4                                                          | 316539 | ENSRNOG00000013213  |
| Cers4   | NA | Cers4   | ceramide synthase 4                                                      | 304208 | ENSRNOG00000001072  |
| Lpin2   | NA | Lpin2   | lipin 2                                                                  | 316737 | ENSRNOG00000014876  |

|           |    |           |                                                      |        |                    |
|-----------|----|-----------|------------------------------------------------------|--------|--------------------|
| Vom2r37   | NA | Vom2r37   | vomeronasal 2 receptor, 37                           | 690356 | ENSRNOG00000043280 |
| Ccdc91    | NA | Ccdc91    | coiled-coil domain containing 91                     | 312863 | NULL               |
| Ankrd32   | NA | Ankrd32   | ankyrin repeat domain 32                             | 294601 | ENSRNOG00000040279 |
| Cdk5rap1  | NA | Cdk5rap1  | CDK5 regulatory subunit associated protein 1         | 252827 | ENSRNOG00000015696 |
| LOC688241 | NA | LOC688241 | similar to GTPase activating protein testicular GAP1 | 688241 | NULL               |
| Tecr      | NA | Tecr      | trans-2,3-enoyl-CoA reductase                        | 191576 | ENSRNOG00000021808 |
| Cpne5     | NA | Cpne5     | copine V                                             | 309650 | ENSRNOG00000000522 |
| Rheb      | NA | Rheb      | Ras homolog enriched in brain                        | 26954  | NULL               |

cellular component   intercalated disc  
C=38;O=3;E=0.14;R=22.12;rawP=0.0003;adjP=0.0198

|      |    |      |                                |        |                    |
|------|----|------|--------------------------------|--------|--------------------|
| Cdh2 | NA | Cdh2 | cadherin 2                     | 83501  | ENSRNOG00000015602 |
| Ptk2 | NA | Ptk2 | PTK2 protein tyrosine kinase 2 | 25614  | ENSRNOG00000007916 |
| Vcl  | NA | Vcl  | vinculin                       | 305679 | ENSRNOG00000010765 |

cellular component   cell-cell contact zone  
C=40;O=3;E=0.14;R=21.02;rawP=0.0004;adjP=0.0198

|      |    |      |                                |        |                    |
|------|----|------|--------------------------------|--------|--------------------|
| Cdh2 | NA | Cdh2 | cadherin 2                     | 83501  | ENSRNOG00000015602 |
| Ptk2 | NA | Ptk2 | PTK2 protein tyrosine kinase 2 | 25614  | ENSRNOG00000007916 |
| Vcl  | NA | Vcl  | vinculin                       | 305679 | ENSRNOG00000010765 |

cellular component   fascia adherens  
C=13;O=2;E=0.05;R=43.11;rawP=0.0010;adjP=0.0226

|      |    |      |            |        |                    |
|------|----|------|------------|--------|--------------------|
| Cdh2 | NA | Cdh2 | cadherin 2 | 83501  | ENSRNOG00000015602 |
| Vcl  | NA | Vcl  | vinculin   | 305679 | ENSRNOG00000010765 |

cellular component   plasma membrane part  
C=1300;O=12;E=4.64;R=2.59;rawP=0.0018;adjP=0.0339

|         |    |         |                                                                |        |                    |
|---------|----|---------|----------------------------------------------------------------|--------|--------------------|
| Stab2   | NA | Stab2   | stabilin 2                                                     | 282580 | NULL               |
| Cacna1a | NA | Cacna1a | calcium channel, voltage-dependent, P/Q type, alpha 1A subunit | 25398  | ENSRNOG00000002559 |
| Itln1   | NA | Itln1   | intelectin 1 (galactofuranose binding)                         | 498284 | ENSRNOG00000004678 |
| Cdh2    | NA | Cdh2    | cadherin 2                                                     | 83501  | ENSRNOG00000015602 |
| Ddr2    | NA | Ddr2    | discoidin domain receptor tyrosine kinase 2                    | 685781 | ENSRNOG00000002881 |
| Ephb1   | NA | Ephb1   | Eph receptor B1                                                | 24338  | ENSRNOG00000007865 |
| Epha4   | NA | Epha4   | Eph receptor A4                                                | 316539 | ENSRNOG00000013213 |

|       |    |       |                                          |        |                    |
|-------|----|-------|------------------------------------------|--------|--------------------|
| Egfr  | NA | Egfr  | epidermal growth factor receptor         | 24329  | ENSRNOG00000004332 |
| Gria4 | NA | Gria4 | glutamate receptor, ionotropic, AMPA 4   | 29629  | ENSRNOG00000006957 |
| Ptk2  | NA | Ptk2  | PTK2 protein tyrosine kinase 2           | 25614  | ENSRNOG00000007916 |
| Nrg1  | NA | Nrg1  | neuregulin 1                             | 112400 | ENSRNOG00000010392 |
| Kcnt2 | NA | Kcnt2 | potassium channel, subfamily T, member 2 | 304827 | ENSRNOG00000013312 |

cellular component cell periphery  
C=3057;O=20;E=10.91;R=1.83;rawP=0.0032;adjP=0.0452

|         |    |         |                                                                |        |                     |
|---------|----|---------|----------------------------------------------------------------|--------|---------------------|
| Cacna1a | NA | Cacna1a | calcium channel, voltage-dependent, P/Q type, alpha 1A subunit | 25398  | ENSRNOG00000002559  |
| Cdh2    | NA | Cdh2    | cadherin 2                                                     | 83501  | ENSRNOG00000015602  |
| Ddr2    | NA | Ddr2    | discoidin domain receptor tyrosine kinase 2                    | 685781 | ENSRNOG00000002881  |
| Ephb1   | NA | Ephb1   | Eph receptor B1                                                | 24338  | ENSRNOG00000007865  |
| Myo9b   | NA | Myo9b   | myosin IXb                                                     | 25486  | ENSRNOG00000016256  |
| Elmo1   | NA | Elmo1   | engulfment and cell motility 1                                 | 361251 | ENSRNOG00000018726  |
| Gria4   | NA | Gria4   | glutamate receptor, ionotropic, AMPA 4                         | 29629  | ENSRNOG00000006957  |
| Vcl     | NA | Vcl     | vinculin                                                       | 305679 | ENSRNOG00000010765  |
| Kcnt2   | NA | Kcnt2   | potassium channel, subfamily T, member 2                       | 304827 | ENSRNOG00000013312  |
| Cdh19   | NA | Cdh19   | cadherin 19, type 2                                            | 360835 | ENSRNOG00000029841  |
| Stab2   | NA | Stab2   | stabilin 2                                                     | 282580 | NULL                |
| Itln1   | NA | Itln1   | intelectin 1 (galactofuranose binding)                         | 498284 | ENSRNOG00000004678  |
| Ppp3cb  | NA | Ppp3cb  | protein phosphatase 3, catalytic subunit, beta isozyme         | 24675  | ENSRNOG00000007757  |
| Epha4   | NA | Epha4   | Eph receptor A4                                                | 316539 | ENSRNOG00000013213  |
| Cyth1   | NA | Cyth1   | cytohesin 1                                                    | 116691 | ENSRNOG000000043381 |
| Vom2r37 | NA | Vom2r37 | vomer nasal 2 receptor, 37                                     | 690356 | ENSRNOG000000043280 |
| Egfr    | NA | Egfr    | epidermal growth factor receptor                               | 24329  | ENSRNOG00000004332  |
| Nrg1    | NA | Nrg1    | neuregulin 1                                                   | 112400 | ENSRNOG00000010392  |
| Ptk2    | NA | Ptk2    | PTK2 protein tyrosine kinase 2                                 | 25614  | ENSRNOG00000007916  |
| Rheb    | NA | Rheb    | Ras homolog enriched in brain                                  | 26954  | NULL                |

cellular component cell-cell junction  
C=273;O=5;E=0.97;R=5.13;rawP=0.0028;adjP=0.0452

|         |    |         |                                              |        |                     |
|---------|----|---------|----------------------------------------------|--------|---------------------|
| Sdccag8 | NA | Sdccag8 | serologically defined colon cancer antigen 8 | 305002 | ENSRNOG00000004181  |
| Cdh2    | NA | Cdh2    | cadherin 2                                   | 83501  | ENSRNOG00000015602  |
| Ptk2    | NA | Ptk2    | PTK2 protein tyrosine kinase 2               | 25614  | ENSRNOG00000007916  |
| Cyth1   | NA | Cyth1   | cytohesin 1                                  | 116691 | ENSRNOG000000043381 |
| Vcl     | NA | Vcl     | vinculin                                     | 305679 | ENSRNOG00000010765  |
